# Supplementary material for: ALIFE2 study: low-molecular-weight heparin for women with recurrent miscarriage and inherited thrombophilia - study protocol for a randomized controlled trial
Source: Springer Nature journal article supplement (doi:10.1186/s13063-015-0719-9), 2015-05-06
Supplement: MOESM1 [file 9782066]

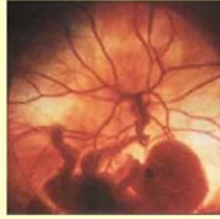

# ALIFE2

## Patiënteninformatie ALIFE2 Studie

### **De invloed van LMWH toediening ter verkleining van de miskraamkans bij vrouwen met herhaalde miskramen en erfelijke trombofilie.**

Geachte mevrouw,

In aansluiting op het gesprek met uw arts ontvangt u hierbij de schriftelijke informatie met betrekking tot het wetenschappelijk onderzoek waarvoor uw medewerking is gevraagd. Neemt u enige bedenktijd voordat u beslist of u meedoet of niet en bespreek dit met uw partner, familie, huisarts of anderen. Indien u vragen heeft, stel deze dan gerust aan ondergetekenden.

Mocht u behoefte hebben uw vragen voor te leggen aan een arts die niet direct bij dit onderzoek betrokken is, dan kunt u de naam en het telefoonnummer van deze onafhankelijke arts vinden op pagina 3 van deze informatie.

#### **Inleiding**

*U bent in dit ziekenhuis vanwege het feit dat u twee of meer miskramen heeft gehad.*

*Uit bloedonderzoek is gebleken dat u een verhoogde stollingsneiging heeft. Dit wordt trombofilie genoemd. Vrouwen met trombofilie hebben iets vaker (herhaalde) miskraam dan vrouwen zonder trombofilie, maar het is onduidelijk of toediening van laag moleculair gewicht heparine (LMWH) het risico op een volgende miskraam verlaagt.*

#### **Doel van het onderzoek**

De ALIFE2 studie onderzoekt of toediening van een antistollingsmiddel (LMWH) gedurende de zwangerschap de kans op een nieuwe miskraam verkleint in vergelijking tot de standaardbehandeling (geen antistollingsmiddel).

#### **Wanneer kunt u deelnemen**

Allereerst zal door uw eigen arts vastgesteld worden of u herhaalde miskramen (minstens twee bewezen miskramen) hebt doorgemaakt zonder goede verklaring en daarnaast erfelijke trombofilie heeft. Wanneer dit allebei is vastgesteld én u bent korter dan 7 weken zwanger kunt u meedoen met het onderzoek. U kunt niet deelnemen aan het onderzoek wanneer u om een andere reden antistolling moet gebruiken in de zwangerschap, zoals een trombosebeen, of wanneer uw nierfunctie niet goed is.

#### **Opzet en belasting**

Het onderzoek waaraan wij u vragen mee te werken heeft als doel na te gaan of toediening van LMWH bij vrouwen met herhaalde miskramen en trombofilie zinvol is. Alleen door het lot te laten bepalen wie LMWH of géén LMWH krijgt toegewezen, kan na geruime tijd vastgesteld worden of in de 'LMWH- groep' meer kinderen geboren worden. Als u in de 'LMWH- groep' komt, zult u in principe beginnen met de medicijnen zodra u zwanger bent tot de bevalling begint. Vrouwen in beide groepen zullen alle zorg krijgen die ze buiten de studie ook zouden hebben gekregen.

Als u LMWH toegewezen heeft gekregen zult u zichzelf eenmaal per dag een injectie toedienen met een kleine naald in de buik of de benen. Daarnaast zal twee keer een buisje bloed worden geprikt (2.7 milliliter) om te controleren of uw bloedplaatjes niet dalen.

Vervolgens zal het verloop van uw zwangerschap worden vastgelegd. Ten behoeve van het onderzoek vragen we u of uw gegevens over uw medische voorgeschiedenis en het beloop van de zwangerschap verzameld mogen worden in een onderzoeksdossier. Daarnaast vragen we u of ook uitslagen van onderzoeken, zoals bloedonderzoek en echo-onderzoek mogen worden verzameld. Na afloop van uw zwangerschap kunnen wij uw gegevens vergelijken met die van andere vrouwen uit het onderzoek; om vast te stellen of LMWH de kans op een miskraam verkleint.

De zwangerschapscontroles vinden gewoon bij uw eigen arts of verloskundige plaats. Indien u in de groep komt die geen LMWH krijgt, dan is de begeleiding en de zorg in de zwangerschap niet anders dan gewoonlijk, maar zullen wij uw gegevens opnemen in het onderzoeksdossier. De gegevens over het verloop van de zwangerschap in de 'LMWH-groep' en de 'niet-LMWH-groep' kunnen wij dan met elkaar vergelijken.

### **De eventuele risico's van het onderzoek**

De behandeling met LMWH zoals die in het onderzoek wordt gegeven, wordt in de dagelijkse praktijk al toegepast (in een hogere doses dan in de studie wordt gebruikt) voor vrouwen met een trombosebeen in de zwangerschap.

Het gebruik van elk medicijn geeft kans op bijwerkingen. Eventuele bijwerkingen kunnen zijn; vaak blauwe plekken (vooral op de injectieplaats), bloedingen, een tekort aan bloedplaatjes en botontkalking. Deze laatste twee bijwerkingen komen maar bij een heel klein deel van de vrouwen voor, maar uit voorzorg zal er tijdens het onderzoek extra controle van de bloedplaatjes plaatsvinden. LMWH passeert niet de placenta en is daarom niet schadelijk voor uw kind.

### **Mogelijke voordelen van het onderzoek**

Het is niet met zekerheid te zeggen dat u persoonlijk voordeel zult hebben bij deelname aan dit onderzoek. De gegevens uit dit onderzoek kunnen echter op langere termijn van nut zijn voor andere patiënten met onverklaarde herhaalde miskraam en erfelijke trombofilie. Als zou blijken dat behandelen met LMWH zinvol is, kan dit het aantal miskramen verminderen. Als zou blijken dat behandelen met LMWH niet zinvol is, kunnen onnodige behandelingen in de toekomst voorkomen worden.

### **Loting**

Om uiteindelijk een goede uitspraak te kunnen doen over het al dan niet nuttig zijn van LMWH toediening, is het belangrijk dat deze beslissing wie de LMWH krijgt niet door een individuele dokter genomen wordt, maar dat dit gebeurt door loting. Dit is nodig om onbewuste beïnvloeding van de wetenschappelijke gegevens te voorkomen. Als u besluit niet mee te doen dan wordt u behandeld zoals dat gebruikelijk is in het ziekenhuis waar u wordt begeleid. Dit betekent dat u géén antistollingsmedicijnen krijgt toegediend, omdat dit niet bewezen effectief is.

### **Vrijwilligheid van deelname**

Uw medewerking aan dit onderzoek is vrijwillig. Als u toestemming geeft om aan dit onderzoek mee te doen, heeft u te allen tijde de vrijheid om op die beslissing terug te komen. U hoeft hiervoor geen reden op te geven, wel wordt u gevraagd dit direct aan uw behandelend arts te melden. Ook uw behandelend arts kan uw deelname aan het onderzoek stopzetten als deze vindt dat dit ten aanzien van uw gezondheid of die van uw zwangerschap beter is. Uw arts bespreekt dit dan met u. Wanneer tijdens het onderzoek nieuwe informatie bekend wordt, zal uw behandelend arts dit eveneens met u bespreken. Het wel of niet meedoen heeft op geen enkele wijze gevolgen voor de verstandhouding met uw arts.

### **Vertrouwelijkheid van de gegevens**

U kunt ervan verzekerd zijn dat alle gegevens die tijdens dit onderzoek onder code (d.w.z. zonder vermelding van uw naam en adres) over u verzameld worden, vertrouwelijk behandeld worden. Naast de betrokken onderzoeker en uw behandelend arts hebben vertegenwoordigers van de inspectie van de gezondheidszorg en door het AMC als opdrachtgever van de studie aangewezen personen inzage in uw dossier. Deze inzage is uitsluitend ter controle van de uitvoering van de studie. Door deelname aan deze studie, geeft u hier ook toestemming voor. Verder zal uw huisarts van uw deelname aan de studie op de hoogte worden gesteld. Als u dit niet wilt, kunt u niet aan de studie meedoen.

Alleen de lokale onderzoeker zal beschikken over de codesleutel en kan dus uw identiteit achterhalen. De gegevens zullen tot 20 jaar na afloop van de studie bewaard worden. De resultaten van het onderzoek kunnen gebruikt worden in een wetenschappelijke publicatie, maar ook dan zijn de gegevens niet tot u als persoon herleidbaar.

### **Goedkeuring Medisch Ethische Toetsingscommissie**

Voor dit onderzoek is goedkeuring verkregen van de Medisch Ethische Toetsingscommissie van het AMC.

### **Verzekering**

Er is een verzekering afgesloten waaruit eventuele schade als gevolg van het onderzoek betaald kan worden. Dit is een wettelijke verplichting bij elk onderzoek dat uitgevoerd wordt. Wanneer u vindt dat u schade heeft ondervonden als gevolg van deelname aan het onderzoek kunt u contact opnemen met de onderzoeker in uw ziekenhuis. Informatie over de afgesloten verzekering treft u aan in de bijlage.

### **Tot slot**

Heeft u nog vragen over deelname aan de studie, aarzel dan niet om contact op te nemen met ondergetekenden. Indien u advies over deelname aan deze studie van een onafhankelijke, niet bij het onderzoek betrokken arts wenst dan kunt u zich wenden tot prof. dr. E.S. Stroes, internist in het AMC, telefoonnummer 020-5666612. .

Wanneer u besluit aan dit onderzoek deel te nemen vragen we u op de toestemmingspagina (het informed consent) een handtekening te zetten. Met de ondertekening verplicht u zich nergens toe (uw handtekening is niet 'bindend'), maar geeft u te kennen dat u deze informatie ontvangen en begrepen heeft en weet wat er van u verwacht wordt met betrekking tot het onderzoek.

Met vriendelijke groet,  
drs. P.G. de Jong, arts-onderzoeker AMC.  
telefoon: 020 – 5668675  
e-mail [alife@amc.uva.nl](mailto:alife@amc.uva.nl).

Mede namens het ALIFE2 team  
Prof. dr. S. Middeldorp, internist  
dr. M. Goddijn, gynaecoloog

### **Bijlagen**

Informatie over verzekeringsaspecten van het onderzoek  
Toestemmingsformulier voor deelname aan de ALIFE2 studie

## Toestemmingsformulier voor deelname aan het wetenschappelijk onderzoek:

### De invloed van toediening van LMWH in de zwangerschap ter verkleining van de miskraamkans bij vrouwen met onverklaarde herhaalde miskraam en erfelijke trombofilie (ALIFE2 studie).

- ✓ Ik ben naar tevredenheid over het onderzoek geïnformeerd. Ik heb de schriftelijke informatie goed gelezen. Ik ben in de gelegenheid gesteld om vragen over het onderzoek te stellen. Mijn vragen zijn naar tevredenheid beantwoord. Ik heb goed over deelname aan het onderzoek kunnen nadenken
- ✓ Ik heb het recht mijn toestemming op ieder moment weer in te trekken zonder dat ik daarvoor een reden hoef op te geven.
- ✓ Ik geef toestemming dat mijn huisarts geïnformeerd zal worden over mijn deelname aan het onderzoek.
- ✓ Ik geef toestemming dat vertrouwelijke gegevens in mijn onderzoeksdossier mogen worden ingezien door vertegenwoordigers van de Inspectie voor de Gezondheidszorg en door het AMC als opdrachtgever van de studie aangewezen personen.
- ✓ Ik geef toestemming dat mijn onderzoeksdossier gedurende 20 jaar na afloop van de studie zal worden bewaard

In de toekomst willen wij u mogelijk nog benaderen voor vervolgonderzoek. U kunt hier aangeven of u daar bezwaar tegen heeft:

JA, u mag mij benaderen voor vervolgonderzoek. In de toekomst kan ik altijd deelname daaraan weigeren.

NEE, ik wens dat u mij niet meer benaderd voor vervolgonderzoek

### Ik stem toe met deelname aan de ALIFE2 studie; onderzoek naar LMWH toediening in de zwangerschap:

Naam

geboortedatum

-----

-----

Datum:

Handtekening:

-----

-----

Ondergetekende verklaart dat de hierboven genoemde persoon zowel schriftelijk als mondeling over het bovenvermelde onderzoek geïnformeerd is.

Naam, functie

datum:

-----

-----

Handtekening:

-----
